# Supplementary material for: Oxidative Stress and Deregulated DNA Damage Response Network in Lung Cancer Patients
Source: MDPI journal article supplement (doi:10.3390/biomedicines10061248), 2022-05-26
Supplement: s1 [file s1]

## Supplementary Materials

### Table of Contents

- Table S1. Genes demonstrating at least 2-fold difference in the transcription activity between lung cancer patients and healthy controls
- Figure S1. ATM Signaling pathway
- Figure S2. Role of BRCA1 in DNA Damage Response
- Figure S3. Base Excision Repair Pathway
- Figure S4. Role of CHK proteins in Cell Cycle Checkpoint Control
- Figure S5. Cell Cycle: G2/M DNA Damage Checkpoint Regulation
- Figure S6. DNA Double-Strand Break Repair by Non-Homologous End Joining
- Figure S7. Cyclins and Cell Cycle Regulation
- Figure S8. p53 Signaling
- Figure S9. Color and shape legends useful for IPA<sup>®</sup> pathway/network representation

**Table S1. Genes demonstrating at least 2-fold difference in the transcription activity between lung cancer patients and healthy controls**

| Ingenuity Canonical Pathways                                 | Molecules                                                                      |
|--------------------------------------------------------------|--------------------------------------------------------------------------------|
| ATM Signaling                                                | ATM↓, CDC25A↑, CHEK1↑, MDC1↑, RAD51↑, RAD9A↑, RBBP8↑, RNF168↑, TP53↓, TP53BP1↑ |
| Role of BRCA1 in DNA Damage Response                         | ATM↓, CHEK1↑, MDC1↑, MLH1↓, MSH2↓, RAD51↑, RBBP8↑, TP53↓                       |
| BER (Base Excision Repair) Pathway                           | APEX1↓, MPG↓, OGG1↓, PARP1↑, PNKP↑, TP53↓                                      |
| Role of CHK Proteins in Cell Cycle Checkpoint Control        | ATM↓, CDC25A↑, CHEK1↑, MDC1↑, RAD9A↑, TP53↓                                    |
| Cell Cycle: G2/M DNA Damage Checkpoint Regulation            | ATM↓, CDK7↑, CHEK1↑, PRKDC↑, TP53↓                                             |
| DNA Double-Strand Break Repair by Non-Homologous End Joining | ATM↓, PARP1↑, PRKDC↑                                                           |
| Cyclins and Cell Cycle Regulation                            | ATM↓, CHEK1↑, MDC1↑, MLH1↓, MSH2↓, RAD51↑, RBBP8↑, TP53↓                       |
| p53 Signaling                                                | ATM↓, CHEK1↑, PRKDC↑, TP53↓                                                    |
| Mismatch Repair in Eukaryotes                                | EXO1↑, MLH1↓, MSH2↓                                                            |
| DNA Double-Strand Break Repair by Homologous Recombination   | ATM↓, RAD51↑                                                                   |
| NER (Nucleotide Excision Repair, Enhanced Pathway)           | CDK7↑, DDB1↑, DDB2↑                                                            |

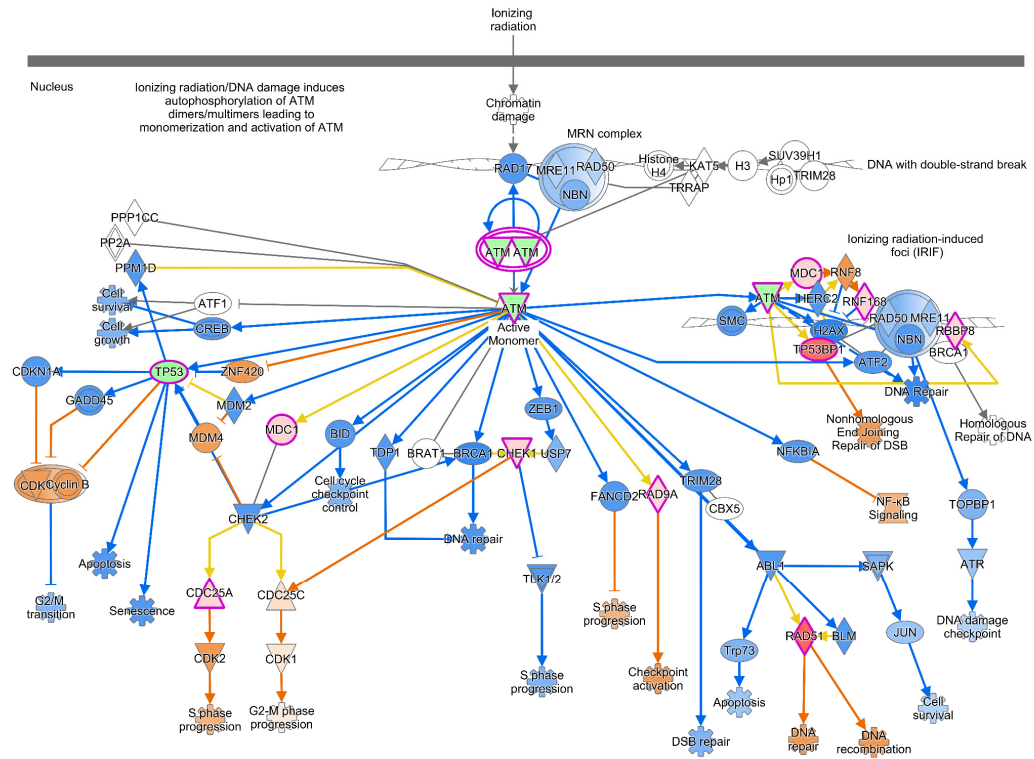

**Figure S1.** ATM Signaling pathway. Canonical pathways related to DNA damage response and repair from IPA® presenting statistically significant ( $P < 0.05$ ) enrichment: ATM Signaling ( $P = 3.03E-18$ ). Color and shape legends are presented in Figure S9.

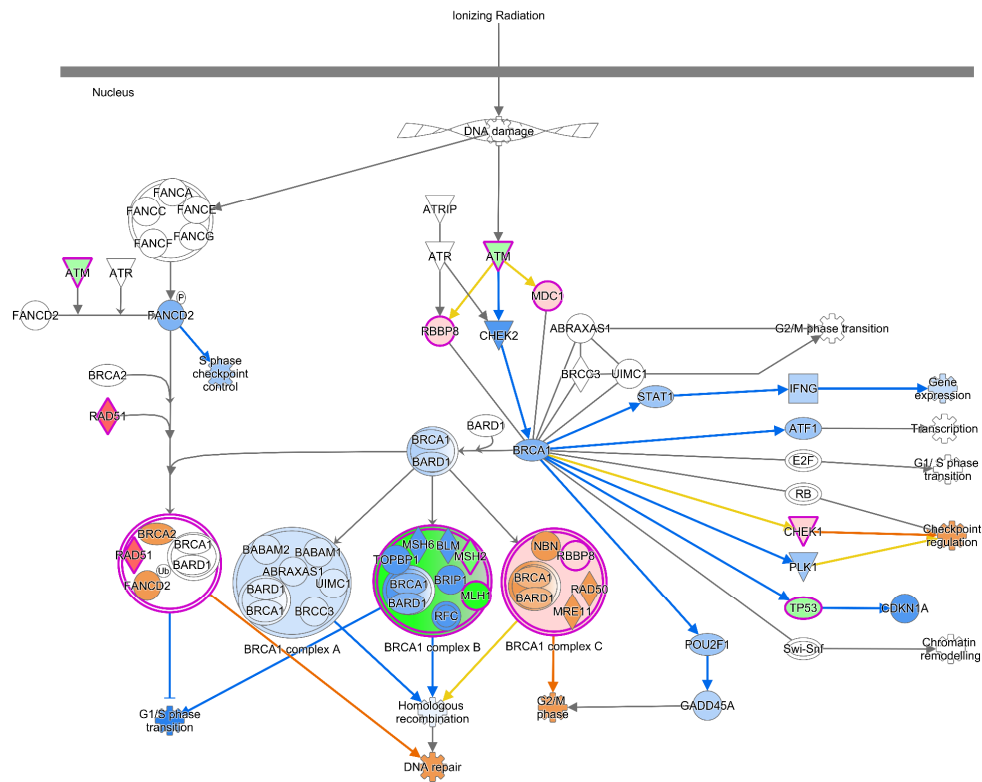

**Figure S2.** Role of BRCA1 in DNA Damage Response. Canonical pathways related to DNA damage response and repair from IPA<sup>®</sup> presenting statistically significant ( $P < 0.05$ ) enrichment: Role of BRCA1 in DNA Damage Response ( $P = 1.18 \times 10^{-14}$ ). Color and shape legends are presented in Figure S9.

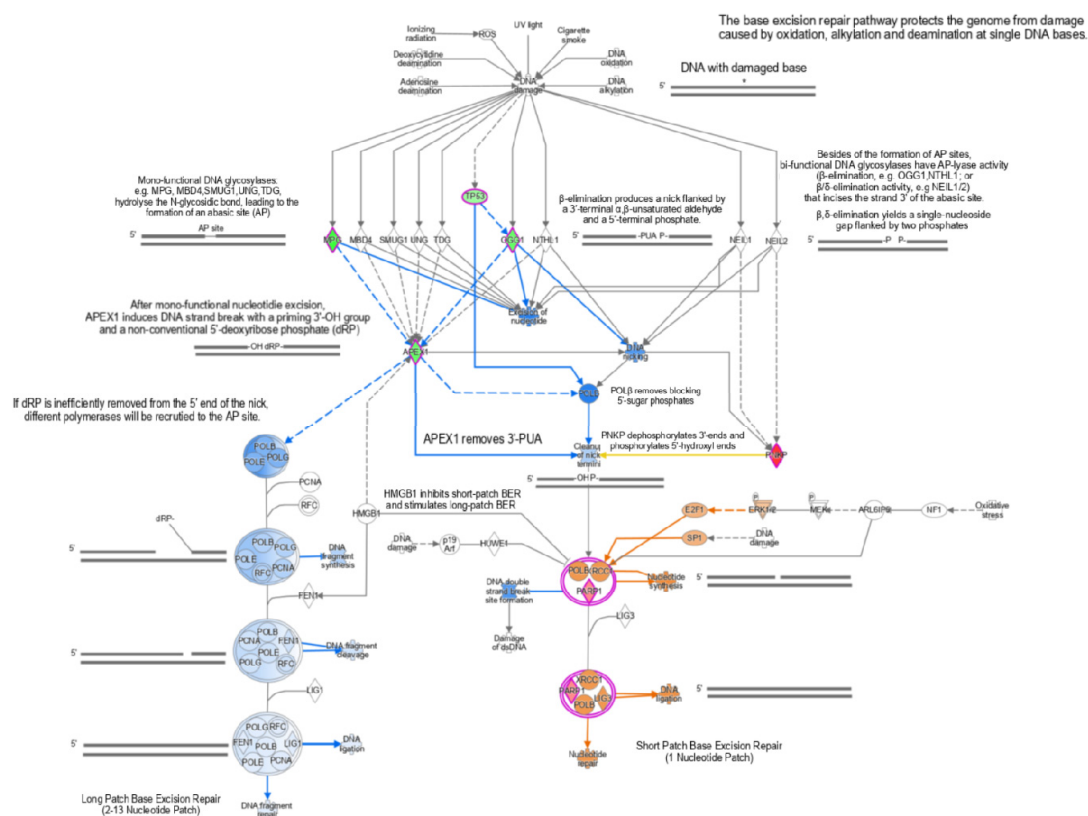

**Figure S3.** Base Excision Repair Pathway. Canonical pathways related to DNA damage response and repair from IPA® presenting statistically significant ( $P<0.05$ ) enrichment: BER pathway ( $P=4.84\text{E-}12$ ). Color and shape legends are presented in Figure S9.

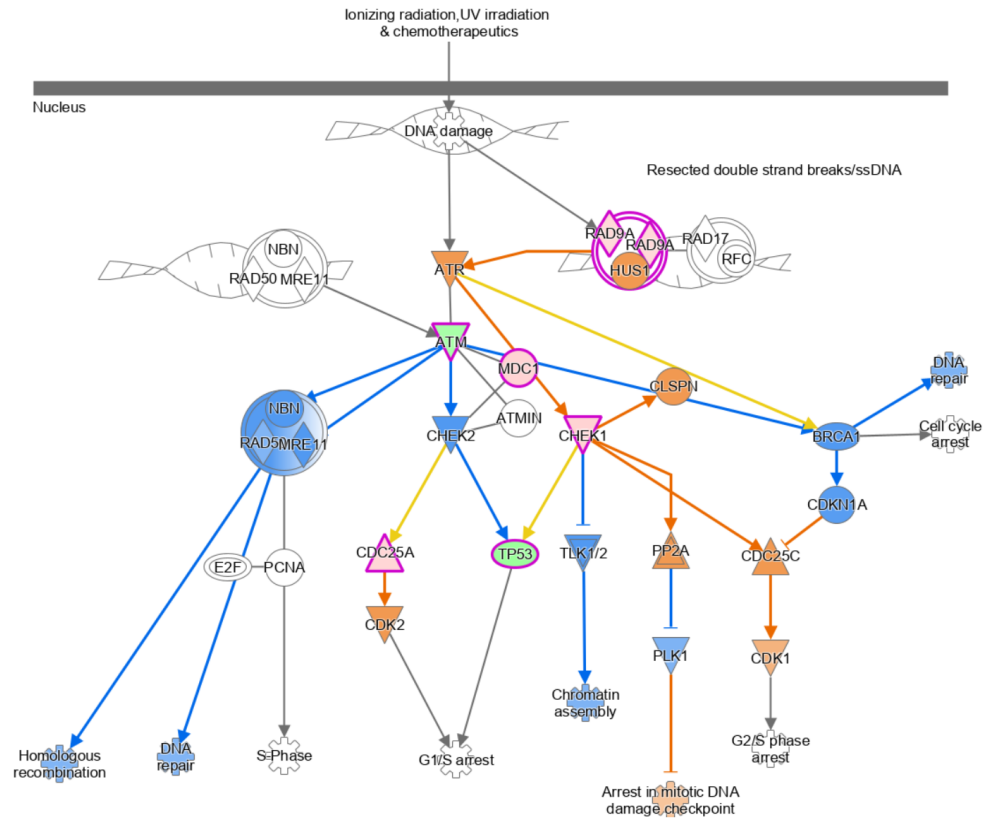

**Figure S4.** Role of CHK proteins in Cell Cycle Checkpoint Control. Canonical pathways related to DNA damage response and repair from IPA<sup>®</sup> presenting statistically significant ( $P < 0.05$ ) enrichment: Role of CHK Proteins in Cell Cycle Checkpoint Control ( $P = 2.46E-11$ ). Color and shape legends are presented in Figure S9.

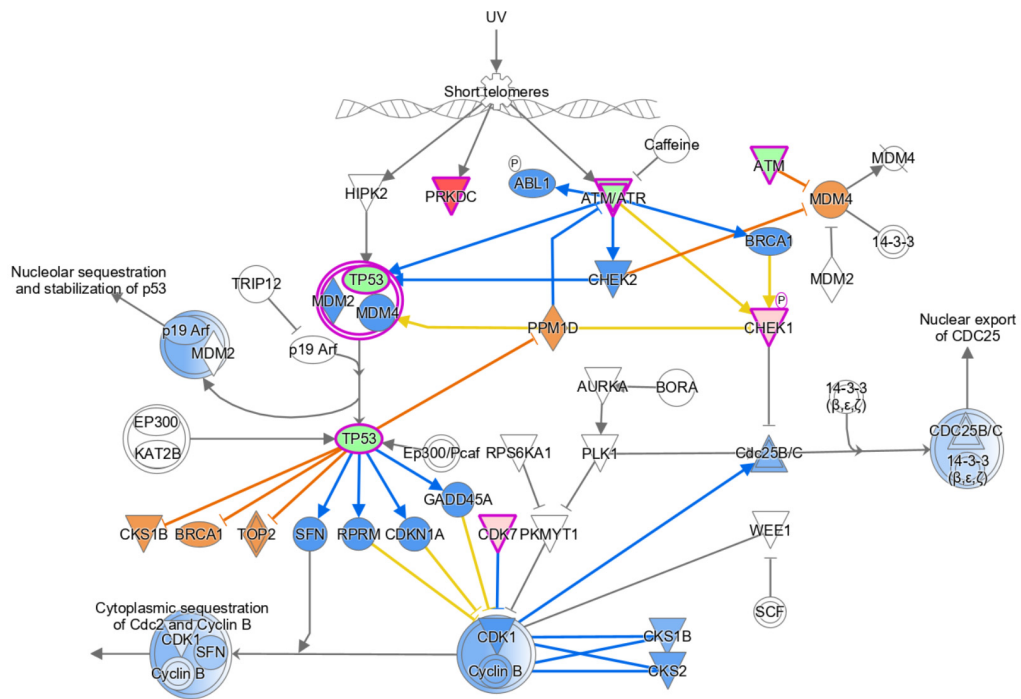

**Figure S5.** Cell Cycle: G2/M DNA Damage Checkpoint Regulation. Canonical pathways related to DNA damage response and repair from IPA® presenting statistically significant ( $P < 0.05$ ) enrichment: Cell Cycle: G2/M DNA Damage Checkpoint Regulation ( $P = 1.72 \times 10^{-9}$ ). Color and shape legends are presented in Figure S9.

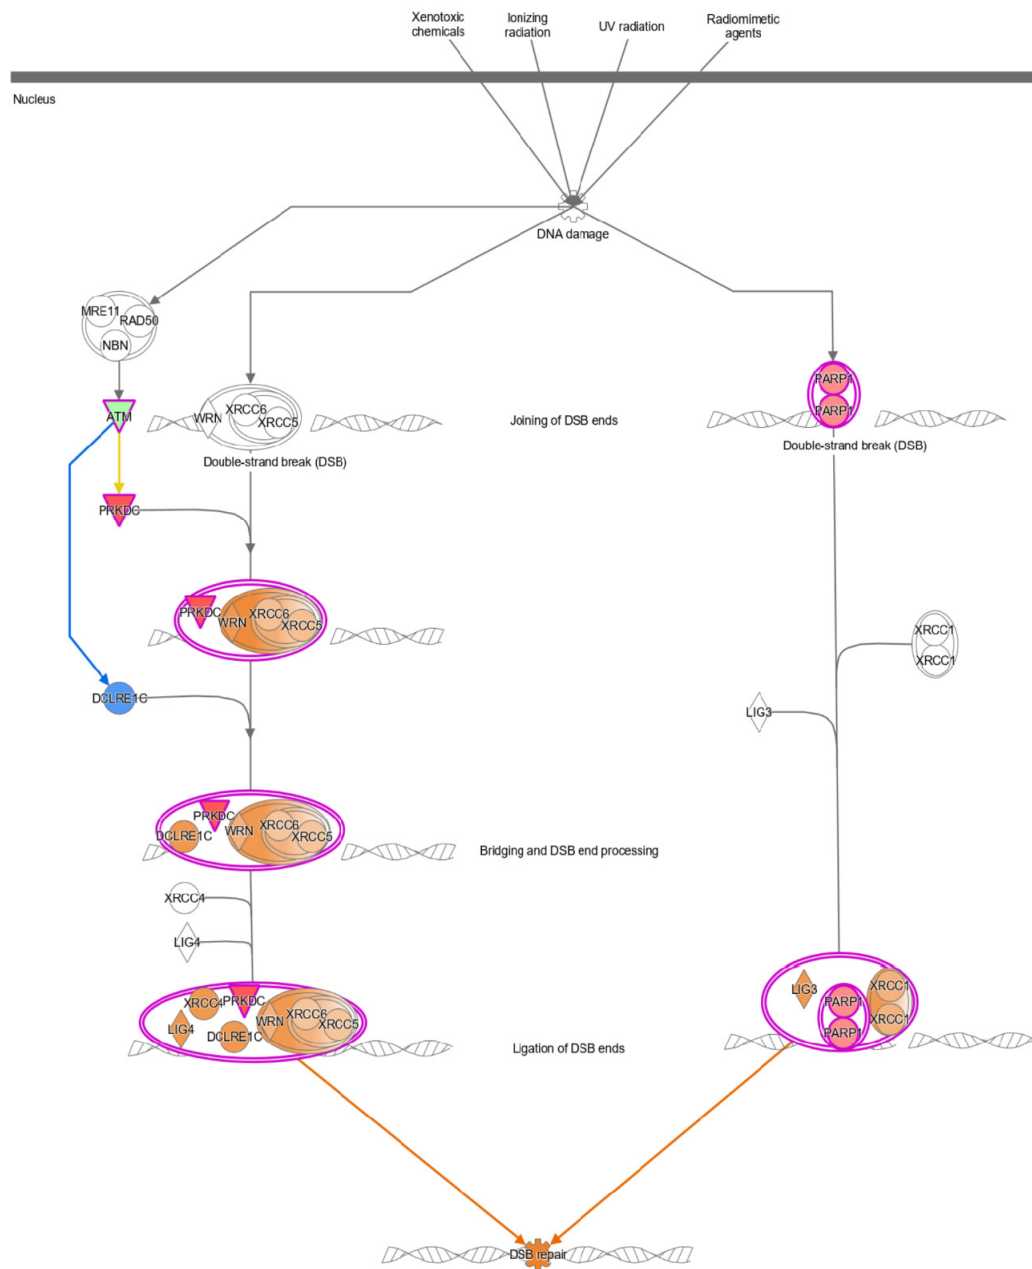

**Figure S6.** DNA Double-Strand Break Repair by Non-Homologous End Joining. Canonical pathways related to DNA damage response and repair from IPA® presenting statistically significant ( $P < 0.05$ ) enrichment: DNA Double-Strand Break Repair by Non-Homologous End Joining ( $P = 3.7E-07$ ). Color and shape legends are presented in Figure S9.



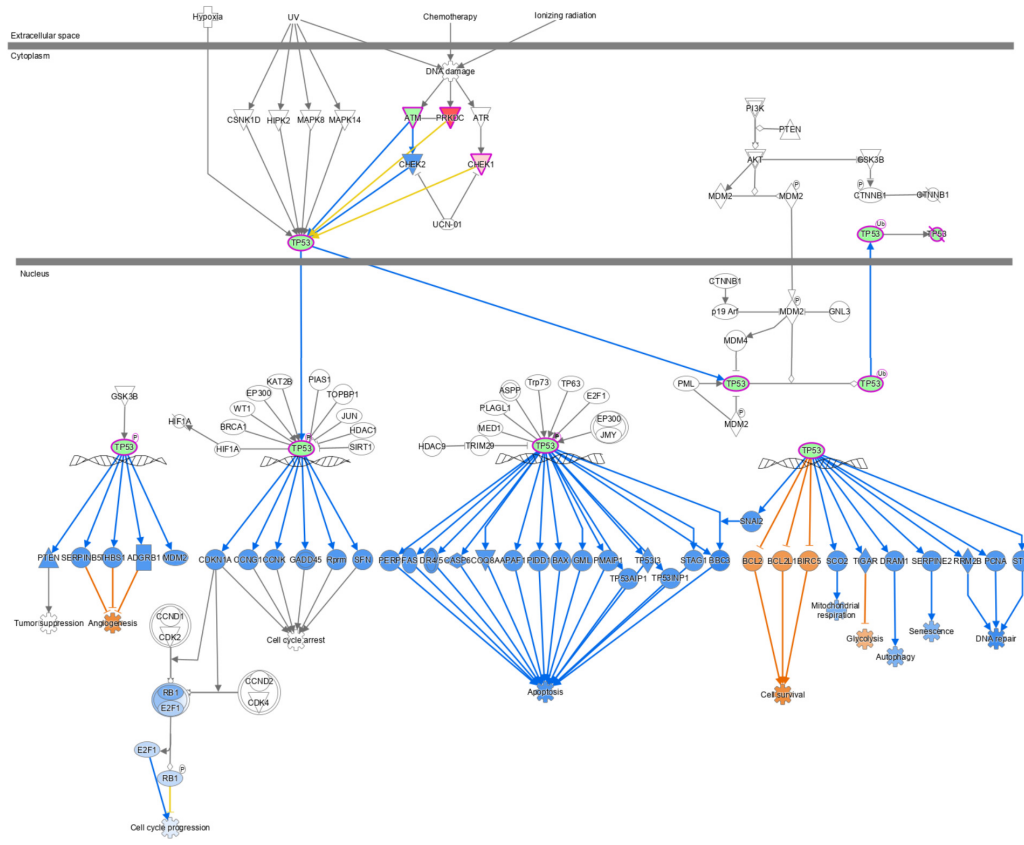

**Figure S8.** p53 Signaling. Canonical pathways related to DNA damage response and repair from IPA<sup>®</sup> presenting statistically significant ( $P < 0.05$ ) enrichment: p53 Signaling ( $P = 3.2E-06$ ). Color and shape legends are presented in Figure S9.

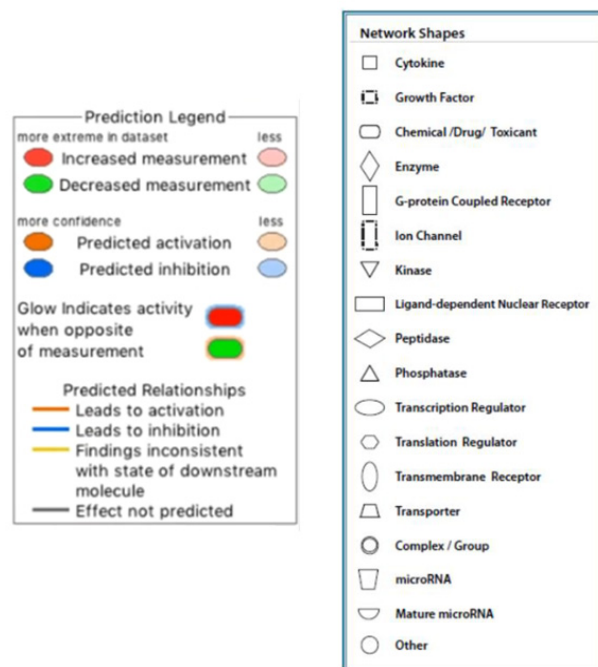

**Figure S9.** Color and shape legends useful for IPA<sup>®</sup> pathway/network representation.
